# Supplementary material
Source: ML conference proceedings conference paper supplement (https://openaccess.thecvf.com/content/ICCV2021/html/Weng_CAPTRA_CAtegory-Level_Pose_ICCV_2021_paper.html)
Supplement: Supplementary file 3 [file Weng_CAPTRA_CAtegory-Level_Pose_ICCV_2021_supplemental.zip]

Archive with 4 entries (4 files):
- 08434-supp.mp4
- __MACOSX/._08434-supp.mp4
- 08434-supp.pdf
- __MACOSX/._08434-supp.pdf
